# Supplementary material for: Importing spontaneous polarization into a Heisenberg ferromagnet for a potential single-phase multiferroic
Source: Royal Society of Chemistry journal article supplement (doi:10.1039/c6tc02715f), 2016-01-01
Supplement: c6tc02715f1.pdf [file c6tc02715f1.pdf]

## Supporting information

# Importing spontaneous polarization into a Heisenberg ferromagnet for a potential single-phase multiferroic

Bo Huang,<sup>a</sup> Bao-Ying Wang,<sup>a</sup> Zi-Yi Du,<sup>b</sup> Wei Xue,<sup>a</sup> Wei-Jian Xu,<sup>a</sup> Yu-Jun Su,<sup>a</sup> Wei-Xiong Zhang,<sup>\*,a</sup> Ming-Hua Zeng,<sup>c</sup> and Xiao-Ming Chen<sup>a</sup>

<sup>a</sup> MOE Key Laboratory of Bioinorganic and Synthetic Chemistry, School of Chemistry & Chemical Engineering, Sun Yat-Sen University, Guangzhou, 510275, China. E-mail: zhangwx6@mail.sysu.edu.cn

<sup>b</sup> College of Chemistry and Chemical Engineering, Gannan Normal University, Ganzhou 341000, China

<sup>c</sup> School of Chemistry and Pharmaceutical Sciences, Guangxi Normal University, Guilin 541004, China.

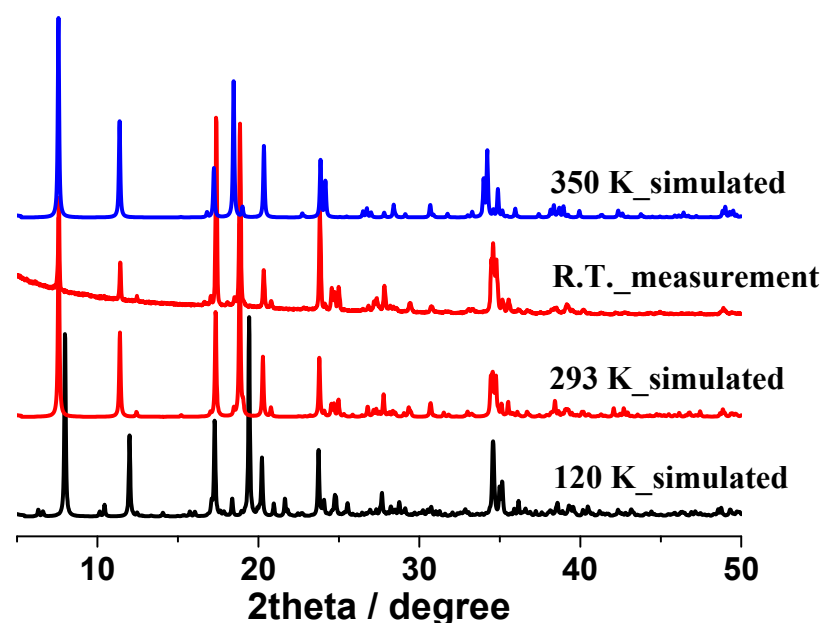

**Fig. S1** The experimental powder XRD pattern at room temperature compared to the simulated one at 120 K, 293 K and 350 K.

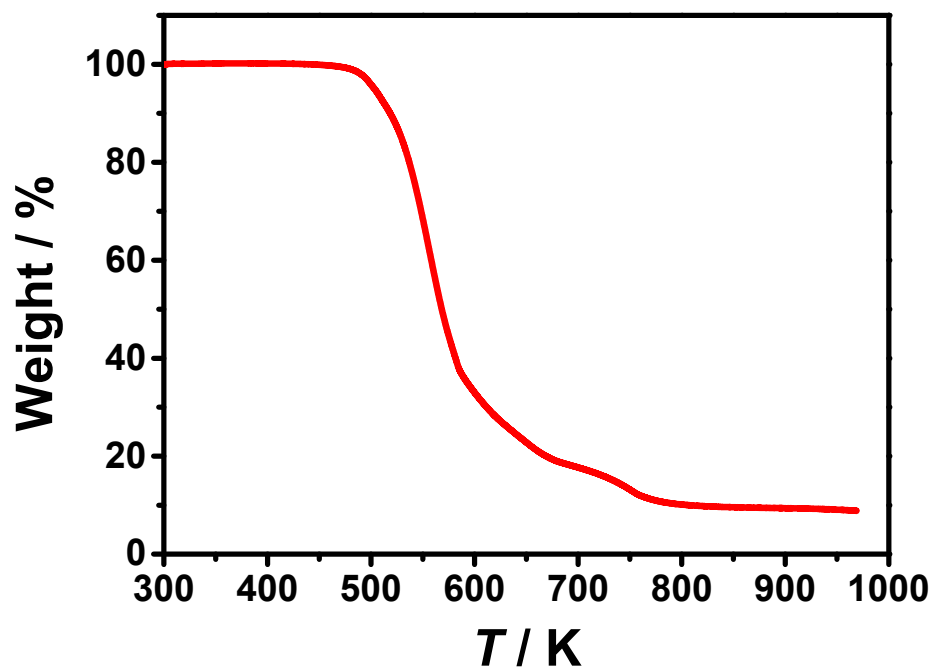

Fig. S2 Thermogravimetric analysis curve at a rate of 5 K/min under N<sub>2</sub> atmosphere.

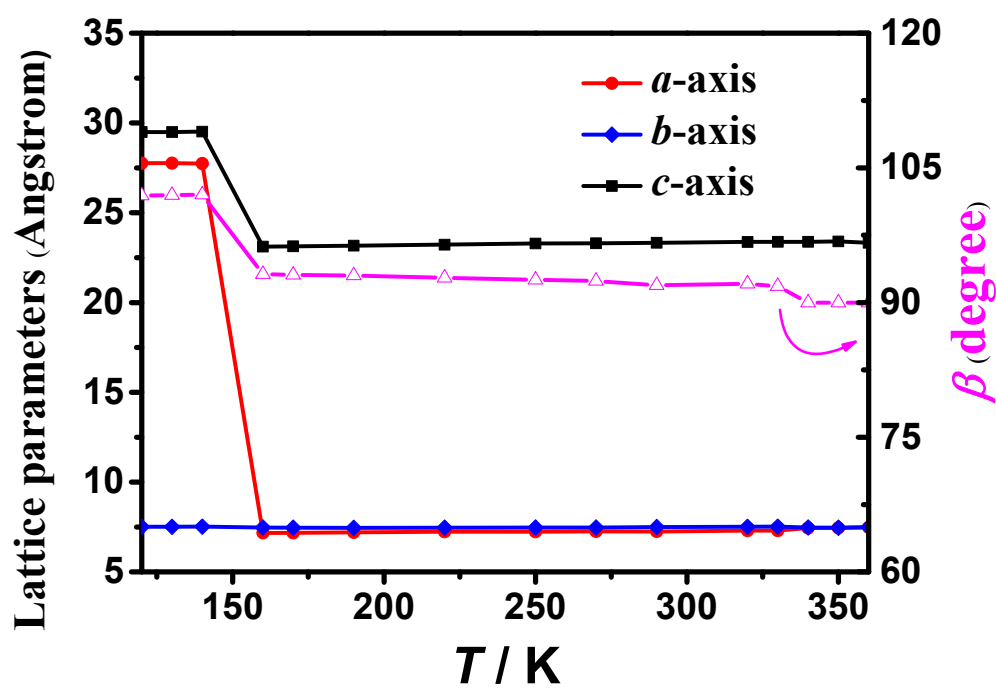

Fig. S3 *In situ* variable-temperature measurements for the cell parameters.

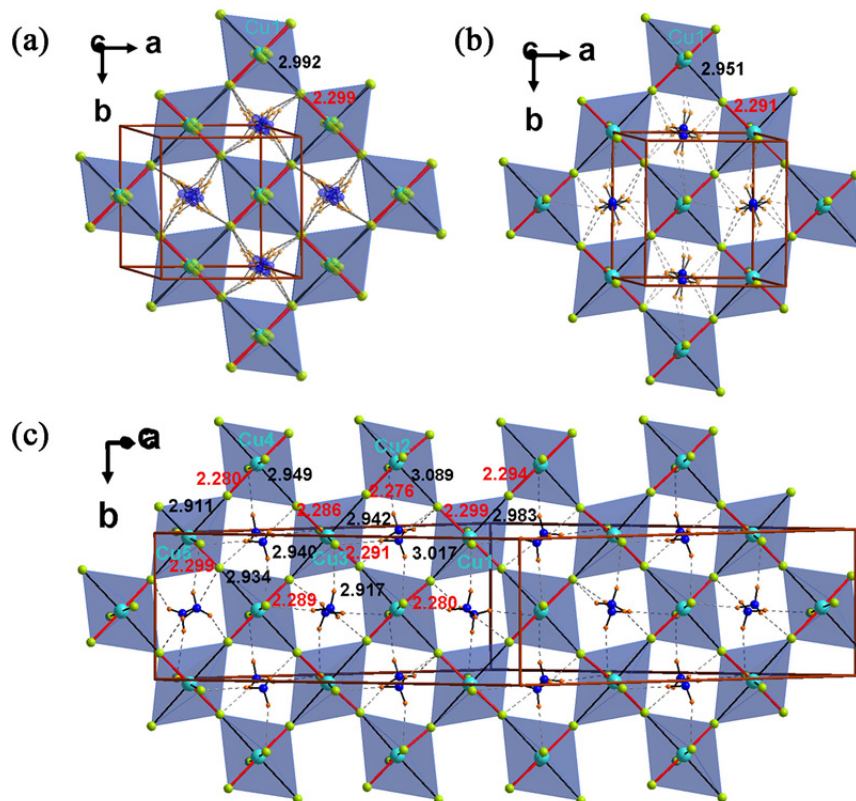

**Fig. S4** Layers of corner-sharing Jahn-Teller distorted  $\text{CuCl}_6$  octahedra at 350 K (a), 293 K (b), and 120 K (c). Cu, Cl, N, and H atoms are shaded in aqua, lime, blue and gold, respectively. Hydrogen bonds are represented by dashed lines. The length of the long (black)/short bonds (red) of the  $\text{CuCl}_6$  octahedron is 2.992/2.299 Å at 350 K, 2.951/2.291 Å at 293 K, and 2.911–3.089/2.276–2.299 Å at 120 K, respectively.

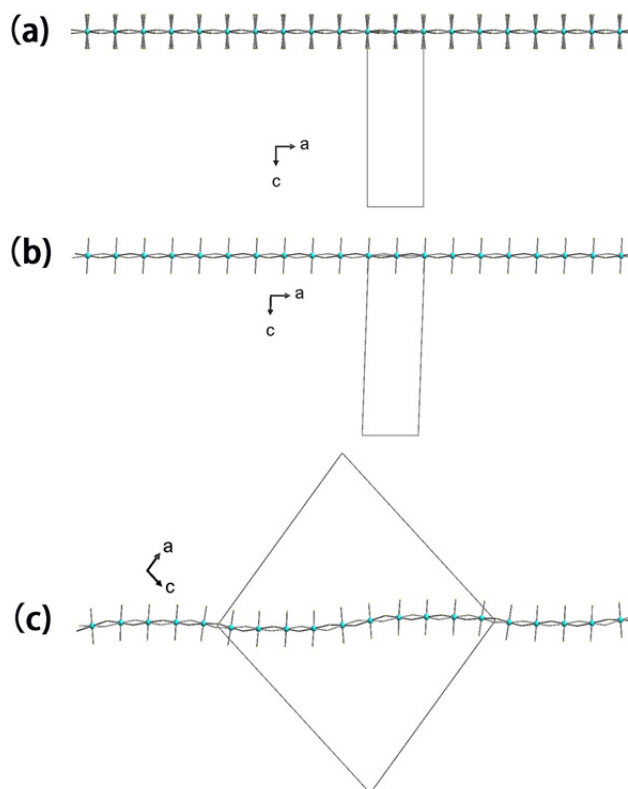

**Fig. S5** The inorganic layer of **1** at 350 K (a), 293 K (b) and 120 K (c).

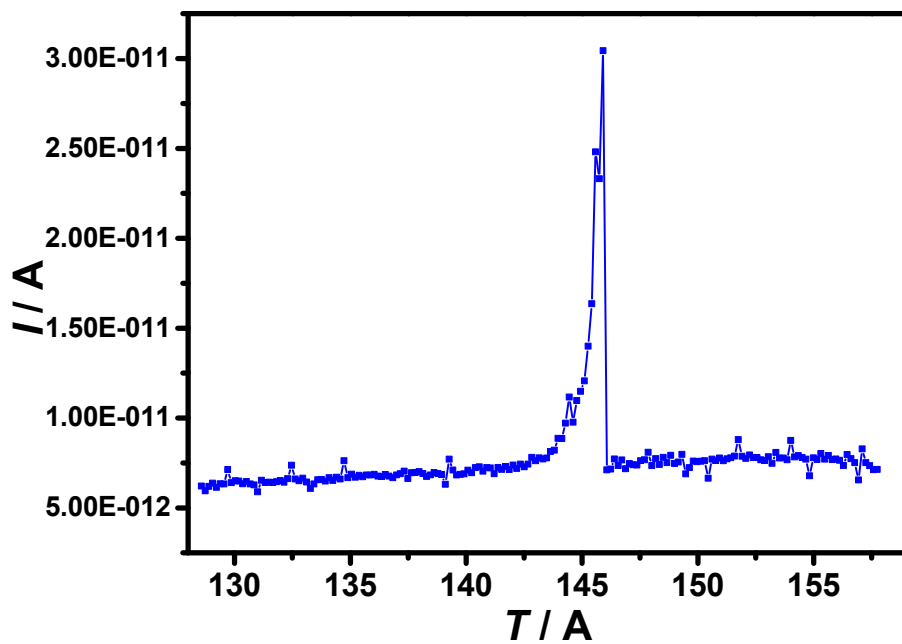

Fig. S6 The pyroelectric current in the vicinity of the ferroelectric phase transition.

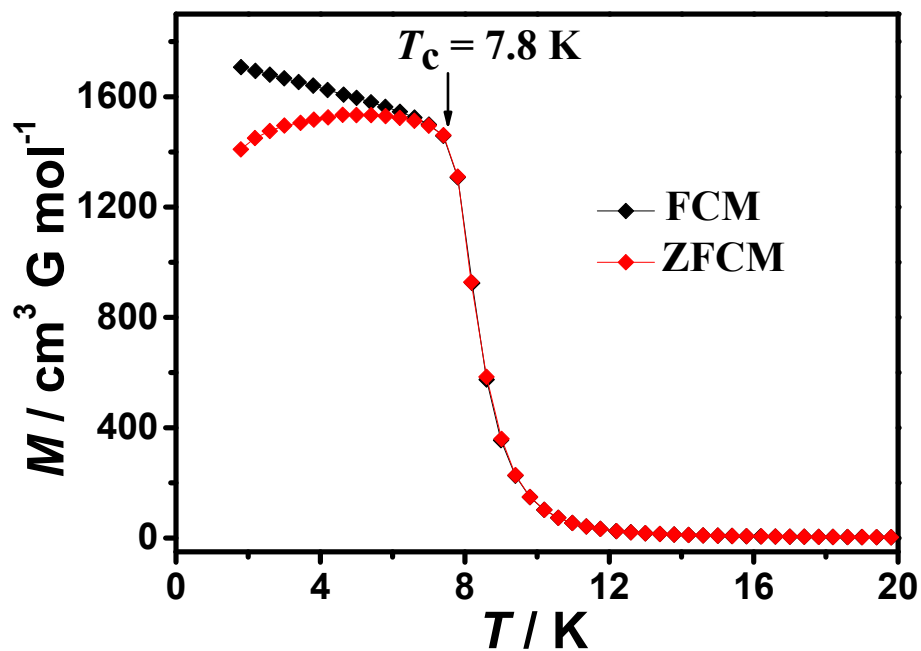

Fig. S7 Zero-field-cooled magnetization and field-cooled magnetization of 1.
